# Supplementary material for: Molecular characterization of human Respiratory Syncytial Virus in Mexico (season 2023–2024) through whole-genome sequencing
Source: Research Square preprint supplement (doi:10.21203/rs.3.rs-5975519/v1), 2025-03-06
Supplement: Supplementary file 1 [file 039ef28da0ebf5e4ae77eb91.xlsx]

## Sheet: NS1 subs
	RSV A			RSV B
	Aminoacid position (NS1 protein)	Freq. (%)		Aminoacid position (NS1 protein)	Freq. (%)
	G2D	1.2		V65L	3.44828
	S3C	1.2		G87E	3.44828
	K33E	1.2		Total=2
	S46N	1.2
	P67L	1.2
	I71V	1.2
	V82I	1.2
	Y88H	1.2
	W90*	1.2
	E91A	1.2
	M93K	1.2
	L95V	1.2
	C98G	1.2
	K112T	1.2
	K115R	1.2
	K116N	1.2
	Total=16

## Sheet: NS2 subs
	RSV A			RSV B
	Aminoacid position (NS2 protein)	Freq. (%)		Aminoacid position (NS2 protein)	Freq. (%)
	T8A	2.46914		T4K	3.44828
	R12K	1.23457		D6N	3.44828
	D17A	2.46914		E33K	3.44828
	D17G	1.23457		D53N	3.44828
	D17V	1.23457		H71L	3.44828
	M18V	1.23457		T82A	3.44828
	I40V	1.23457		I117T	6.89655
	R50K	1.23457		Total=7
	L52H	1.23457
	T58I	2.46914
	F59I	1.23457
	F61L	1.23457
	E66K	1.23457
	N85T	1.23457
	T86A	3.7037
	K87N	1.23457
	T90A	1.23457
	Total=17

## Sheet: N subs
	RSV A			RSV B
	Aminoacid position (N protein)	Freq. (%)		Aminoacid position (N protein)	Freq. (%)
	L12F	1.23457		I33M	3.44828
	T24A	1.23457		P36L	3.44828
	N37D	2.46914		Y38H	6.89655
	L47I	1.23457		L51I	3.44828
	A57V	1.23457		A57V	3.44828
	G63E	1.23457		I80R	10.3448
	L83I	1.23457		V97I	100
	D96N	1.23457		Y100H	3.44828
	T99S	2.46914		S117A	3.44828
	H100Q	1.23457		S121T	3.44828
	M109R	1.23457		V125I	3.44828
	F111C	1.23457		M138R	3.44828
	V113G	1.23457		L219F	3.44828
	A117E	1.23457		F243L	3.44828
	L119V	1.23457		S253A	6.89655
	I123V	1.23457		Q283H	3.44828
	M138L	1.23457		V324I	6.89655
	E144K	1.23457		Total=17
	E148D	1.23457
	Y149H	1.23457
	D152A	1.23457
	D152N	1.23457
	P154L	1.23457
	Y216C	1.23457
	A244S	1.23457
	R259W	1.23457
	V262L	1.23457
	S310T	1.23457
	K351N	1.23457
	V352A	95.0617
	L357H	1.23457
	K358E	1.23457
	K358T	3.7037
	E359A	1.23457
	G361V	1.23457
	V362E	1.23457
	V362L	1.23457
	I363F	1.23457
	I363L	1.23457
	N364H	1.23457
	N364T	1.23457
	Y365S	1.23457
	V367I	1.23457
	V367L	3.7037
	L368F	1.23457
	T371P	1.23457
	E373V	1.23457
	E374D	1.23457
	Total=48

## Sheet: P subs
	RSV A			RSV B
	Aminoacid position (P protein)	Freq. (%)		Aminoacid position (P protein)	Freq. (%)
	G26R	1.23457		S45A	3.44828
	P34S	1.23457		T60I	3.44828
	E53D	1.23457		P73S	3.44828
	L55P	95.0617		T92I	3.44828
	T57P	1.23457		V171I	3.44828
	N59T	1.23457		A183T	3.44828
	S60P	1.23457		P218S	3.44828
	P65Q	2.46914		D229G	3.44828
	E68A	1.23457		Total=8
	T69I	27.1605
	V73E	1.23457
	G74E	1.23457
	N78Y	1.23457
	T92I	1.23457
	T92M	11.1111
	R191K	1.23457
	L192Q	1.23457
	S215P	1.23457
	L216H	2.46914
	L216R	1.23457
	N217D	1.23457
	N217K	1.23457
	N217T	1.23457
	P218T	2.46914
N–P interaction?	S237T	1.23457
	L238F	2.46914
	Total=26

## Sheet: M subs
	RSV A			RSV B
	Aminoacid position (M protein)	Freq. (%)		Aminoacid position (M protein)	Freq. (%)
	N6D	2.46914		I34V	3.44828
	D27N	1.23457		Q83H	3.44828
	M43I	51.8519		N87K	3.44828
	M73L	23.4568		S91C	3.44828
	V106I	2.46914		E98A	3.44828
	Q221K	1.23457		V122A	6.89655
	F222Y	2.46914		S124N	6.89655
	V224L	1.23457		F137L	10.3448
	D225E	2.46914		E142D	10.3448
	D225K	1.23457		M153V	17.2414
	K232Y	1.23457		R157K	10.3448
	P253L	1.23457		K170R	10.3448
	Total=12			S176T	6.89655
				A181T	6.89655
				Total=14

## Sheet: SH subs
RSV A				RSV B
Aminoacid position (SH protein)	Freq. (%)			Aminoacid position (SH protein)	Freq. (%)
E2G	1.23457			G2E	3.44828
F10L	1.23457			S29F	3.44828
S11T	13.5802			M37I	3.44828
F14Y	1.23457			L44P	3.44828
I38S	2.46914			I49T	3.44828
I38T	1.23457			K53R	10.3448
V49A	3.7037			D64N	6.89655
V49I	1.23457			Total=7
F50Y	1.23457
H51Q	2.46914
R61Q	1.23457
Total=11

## Sheet: G subs
	RSV A			RSV B
	Aminoacid position (G protein)	Freq. (%)		Aminoacid position (G protein)	Freq. (%)
	R8C	1.23457		A42T	3.44828
	A10T	3.7037		V45A	3.44828
	T19N	1.23457		V45I	3.44828
	T19S	1.23457		A57V	3.44828
	N21S	1.23457		A74V	100
	L35H	1.23457		K85T	10.3448
	S37A	1.23457		S95L	3.44828
	A39V	1.23457		P96S	3.44828
	L43I	1.23457		V99A	3.44828
	I49T	1.23457		S100G	93.1034
	I56M	1.23457		A107T	6.89655
	A57V	25.9259		P109S	20.6897
	A57T	25.9259		I118M	3.44828
	A58P	1.23457		S119P	3.44828
	V69I	1.23457		T130I	10.3448
	T70A	1.23457		T131A	100
	P71L	95.0617		K134E	3.44828
	I75V	1.23457		G135D	3.44828
	I76M	1.23457		T136R	6.89655
	I76T	1.23457		I137T	100
	A79V	1.23457		T139I	34.4828
	I83V	1.23457		N144K	3.44828
	N85Y	1.23457		N144T	3.44828
	P88S	13.5802		I187V	3.44828
	H90Y	100		P188S	3.44828
	T92S	1.23457		T198I	10.3448
	N94D	1.23457		D213G	3.44828
	N94T	1.23457		P214S	89.6552
	L97F	2.46914		L217P	10.3448
	S100N	25.9259		P221L	89.6552
	L101F	92.5926		I227T	6.89655
	L101P	1.23457		E239G	3.44828
	L101S	2.46914		T242A	3.44828
	L101V	1.23457		T244N	3.44828
	N103H	1.23457		Q246L	6.89655
	N103T	3.7037		V249A	3.44828
	S105F	1.23457		D251E	3.44828
	G106E	16.0494		D251N	3.44828
	S111F	1.23457		I252T	100
	T112N	1.23457		T253A	3.44828
	T113I	17.284		K256D	3.44828
	I114M	4.93827		K256N	68.9655
	I114T	1.23457		T258I	6.89655
	L115P	4.93827		S265P	48.2759
	P120L	1.23457		I268T	89.6552
	S121I	1.23457		D271N	3.44828
	A122T	1.23457		S275P	89.6552
	A122V	3.7037		T278A	3.44828
	S124L	1.23457		T279I	10.3448
	P126T	1.23457		S283P	6.89655
	Q127L	2.46914		L284I	3.44828
	V131D	17.284		Y285H	86.2069
	I133V	3.7037		I288T	10.3448
	I134K	100		T296A	3.44828
	T137A	7.40741		T298K	6.89655
	T138M	1.23457		P304S	10.3448
	Q140R	3.7037		S307L	3.44828
	I141L	1.23457		I310T	3.44828
	I141T	2.46914		I310V	3.44828
	L142S	54.321		*311Q	10.3448
	P143S	1.23457		Total=60
	S144I	3.7037
	T147A	1.23457
	R151Q	1.23457
	N161D	1.23457
HCD	F168Y	9.87654
HCD	S177G	3.7037
HCD	N178G	13.5802
	I189T	1.23457
	K204N	2.46914
	P206Q	25.9259
	K209R	23.4568
	T210A	1.23457
	T210I	4.93827
	T211N	1.23457
	D214Y	2.46914
	P217S	1.23457
	P222S	1.23457
	G224A	2.46914
	G224D	1.23457
	G224E	58.0247
	G224V	38.2716
	P230S	1.23457
	P230T	1.23457
	P234L	1.23457
	P234S	1.23457
	T235A	1.23457
	T235I	18.5185
	N237K	1.23457
	T238A	1.23457
	T241A	1.23457
	N242T	1.23457
	S243I	96.2963
	S243T	2.46914
	T245A	7.40741
	T245I	1.23457
	T246A	17.284
	L247P	1.23457
	L248I	18.5185
	N251K	1.23457
	K253R	1.23457
	G254R	14.8148
	N255D	2.46914
	N255T	11.1111
	P256S	7.40741
	E257D	1.23457
	H258Q	14.8148
	H258R	2.46914
	T259K	1.23457
	K262E	95.0617
	E263K	1.23457
	E263V	1.23457
	I265L	97.5309
	H266L	13.5802
	S267P	1.23457
	T268I	1.23457
	T269I	1.23457
	S270L	1.23457
	S270P	2.46914
	E271K	2.46914
	G272D	1.23457
	G272S	1.23457
	Y273H	7.40741
	P274L	27.1605
	P274T	1.23457
	P276Q	2.46914
	P276S	2.46914
	V279I	1.23457
	Y280H	12.3457
	T282I	1.23457
	D284G	97.5309
	E286G	2.46914
	T293I	1.23457
	S294P	20.9877
	G296S	3.7037
	Y297H	1.23457
	P298L	12.3457
	P298S	2.46914
	S299N	1.23457
	P300S	3.7037
	S301P	1.23457
	Q302K	1.23457
	V303A	19.7531
	Y304H	65.4321
	T305I	1.23457
	E308K	2.46914
	Y309H	1.23457
	L310P	20.9877
	S311P	1.23457
	L314P	9.87654
	S315P	3.7037
	S316P	1.23457
	S317F	3.7037
	T319K	7.40741
	T319I	43.2099
	T320A	60.4938
	Total=156

## Sheet: F subs
RSV A			RSV B
Aminoacid position (F protein)	Freq. (%)		Aminoacid position (F protein)	Freq. (%)
L3S	2.46914		F12I	17.2414
P4S	1.23457		A19S	3.44828
I5V	1.23457		S38R	3.44828
L6H	2.46914		R42K	41.3793
A10T	1.23457		I59V	3.44828
T12I	18.5185		Q94K	3.44828
T12L	1.23457		V103A	3.44828
T13A	12.3457		T118A	6.89655
L15F	3.7037		L125Q	3.44828
F22L	1.23457		Q172L	3.44828
L45F	1.23457		L173S	3.44828
I57V	1.23457		S190N	96.5517
I59V	4.93827		R191K	3.44828
L83*	1.23457		M206I	3.44828
L93M	1.23457		R209Q	6.89655
Q94*	2.46914		S211N	96.5517
L95M	1.23457		S255N	3.44828
S99N	1.23457		D310N	3.44828
T100I	1.23457		S389P	96.5517
A102V	1.23457		K445R	3.44828
A103T	24.6914		L467F	3.44828
L111I	1.23457		V495I	3.44828
M115I	2.46914		I525V	3.44828
L119F	4.93827		A529V	3.44828
T122A	28.3951		I542V	3.44828
N124T	3.7037		N569H	6.89655
V127I	32.0988		A571P	3.44828
S146P	1.23457		Total=27
I148S	1.23457
V154I	2.46914
I206A	4.93827
E236Q	1.23457
V239I	3.7037
T244P	1.23457
T245A	1.23457
T253P	1.23457
L258I	1.23457
N262K	1.23457
S276N	1.23457
V281G	1.23457
S290A	1.23457
L305R	1.23457
P312T	1.23457
N325K	1.23457
R364Q	1.23457
C367F	1.23457
T369I	1.23457
N371S	1.23457
N380I	1.23457
V402I	1.23457
S415P	1.23457
S415A	1.23457
S415L	1.23457
Y417C	1.23457
S466N	1.23457
K470R	18.5185
A518V	3.7037
V536I	1.23457
R553K	17.284
T558S	2.46914
Total=60

## Sheet: M2-1 subs 
	RSV A			RSV B
	Aminoacid position (M2-1 protein)	Freq. (%)		Aminoacid position (M2-1 protein)	Freq. (%)
	R4K	2.46914		R19K	3.44828
	K8T	2.46914		K45R	3.44828
	G13C	1.23457		I76V	3.44828
	G13S	1.23457		I104T	3.44828
	H14Q	1.23457		P120L	3.44828
	K52R	2.46914		I125V	6.89655
	A64V	1.2		E136D	3.44828
	V77A	1.23457		S142N	3.44828
	V77I	2.46914		I161K	3.44828
	Q93K	1.23457		N175S	3.44828
	A95E	1.23457		I181V	3.44828
	V97L	2.46914		Total=11
	T104A	1.23457
	D116G	1.23457
	P120L	1.23457
	E136D	1.23457
	S170N	1.23457
	N174S	29.6296
	N175S	1.23457
	S176P	97.5309
	T180A	29.6296
	S182G	3.7037
	D183E	1.23457
	D186N	1.23457
	*195C	3.7037
	Total=25

## Sheet: M2-2 subs
	RSV A			RSV B
	Aminoacid position (M2-2 protein)	Freq. (%)		Aminoacid position (M2-2 protein)	Freq. (%)
	T1M	33.3333		I2T	100
	D11N	1.23457		M27T	93.1034
	D11V	3.7037		D35N	96.5517
	K12R	1.23457		I36T	3.44828
	N18S	2.46914		C49F	96.5517
	S24N	1.23457		I54V	3.44828
	Y26C	75.3086		K63R	3.44828
	V28I	1.23457		I87V	3.44828
	Q44R	3.7037		Total=8
	S46N	100
	H47Y	2.46914
	P51L	3.7037
	F55V	1.23457
	W60*	1.23457
	S62F	1.23457
	S62T	1.23457
	D64A	1.23457
	D64E	2.46914
	D64G	8.64198
	I66V	4.93827
	D67E	2.46914
	A68S	1.23457
	A68T	2.46914
	Q70P	1.23457
	N71K	1.23457
	Q74H	1.23457
	H75L	1.23457
	H75Y	1.23457
	L76P	1.23457
	I78V	2.46914
	T79A	16.0494
	I82T	1.23457
	T84A	1.23457
	Total=33

[truncated: 1 more sheets: L subs]
